# Supplementary material
Source: PubMed Central journal article supplement (PMC3912907)

***Trypanosoma brucei* (UMP synthase null mutants) are avirulent in mice, but recover virulence upon prolonged culture *in vitro* while retaining pyrimidine auxotrophy**

Han B Ong, Natasha Sienkiewicz<sup>1</sup>, Susan Wyllie, Stephen Patterson and Alan H Fairlamb

Divisional of Biological Chemistry and Drug Discovery, College of Life Sciences, University of Dundee, DD1 5EH, UK

E-mail: [a.h.fairlamb@dundee.ac.uk](mailto:a.h.fairlamb@dundee.ac.uk) Tel.: +44 1382 385155

**Table S1 Growth of WT and DKO parasites cultured in various media**

**Table S2 Cloning primers**

**Figure S1 Genotypic analysis of WT, DKO and DKO cell lines isolated from mice**

**Figure S2 Effect of pyrimidines on the sensitivity of WT cells to pyrazofurin**

## Supporting information

**Table S1 Growth of WT and DKO parasites cultured in various media.** The composition of the basal medium is described in Experimental Procedures.

| Trypanosome Basal Medium (TBM) Supplements | Doubling time (h)        |                          |                 |                  |
|--------------------------------------------|--------------------------|--------------------------|-----------------|------------------|
|                                            | WT plus thymidine        | DKO plus thymidine       | WT no thymidine | DKO no thymidine |
| 10% FCS / 10% Serum Plus                   | 5.53 ± 0.01 <sup>a</sup> | 6.23 ± 0.01 <sup>a</sup> | -               | -                |
| 10% FCS                                    | 6.05 ± 0.01              | 7.16 ± 0.02              | 6.11 ± 0.01     | 7.21 ± 0.01      |
| 10% dialysed FCS                           | 7.63 ± 0.01              | No growth                | 7.60 ± 0.01     | No growth        |
| 10% dialysed FCS / 100 µM uracil           | 7.35 ± 0.03              | 7.42 ± 0.04              | 7.40 ± 0.01     | 7.61 ± 0.02      |
| 10% dialysed FCS / 100 µM uridine          | 7.35 ± 0.01              | 17.01 ± 0.25             | 7.40 ± 0.01     | 17.18 ± 0.10     |
| 10% dialysed FCS / 1,000 µM uridine        | 7.35 ± 0.02              | 7.22 ± 0.04              | 7.35 ± 0.02     | 7.35 ± 0.01      |

<sup>a</sup>This medium is commonly referred to as HMI9T, used for routine culture of bloodstream forms of *T. brucei*.

## Table S2 Cloning primers

Upper case letters refer to nucleotides corresponding to gene sequences in *T. brucei*; lower case refers to additional sequences used in generating constructs. Restriction endonuclease sites are underlined.

---

| Primer name           | Primer sequence                                                  |
|-----------------------|------------------------------------------------------------------|
| 5'UTR-NotI_s          | 5'ataagaat <u>gcgccgc</u> TACAACATGCGTTTGATCTATCAGT 3'           |
| 5'UTR-HindIII/PmeI_as | 5'gtttaaacttacggaccgt <u>caagctt</u> TTTGTAAGTGTTCCTTTCACAAC 3'  |
| 3'UTR-PmeI/BamHI_s    | 5'gacggtccgtaagttaa <u>acggatcc</u> GTGGGTCGGAGCTCTATCTTTAAGC 3' |
| 3'UTR-NotI_as         | 5'ataagtaag <u>gcgccgc</u> TACCCTTCAATGCAGAGGGCACCACAGC 3'       |

---

**Figure S1. Genotypic analysis of WT, DKO and DKO cell lines isolated from mice.**

Southern blot analysis of SacI-digested genomic DNA (~5 µg) WT, DKO and DKO cell lines isolated from 5 different mice using a probe against the 5'-UTR of UMPS.

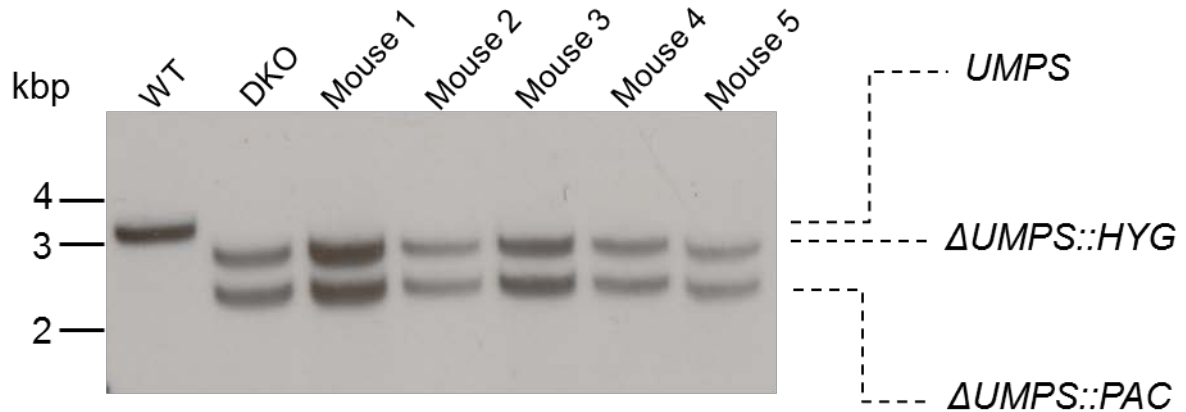

**Figure S2 Effect of pyrimidines on the sensitivity of WT cells to pyrazofurin.** The  $EC_{50}$  values of pyrazofurin against WT cells was determined in TBM<sup>dFCS</sup> alone (closed circles;  $0.42 \pm 0.01 \mu\text{M}$ ) or in the presence of 100  $\mu\text{M}$  uracil (open squares;  $0.44 \pm 0.01 \mu\text{M}$ ) or 100  $\mu\text{M}$  uridine (closed squares;  $0.51 \pm 0.01 \mu\text{M}$ ) or 100  $\mu\text{M}$  orotate (open circles;  $0.43 \pm 0.02 \mu\text{M}$ ). Results are the means  $\pm$  S.E.M. of triplicate measurements.

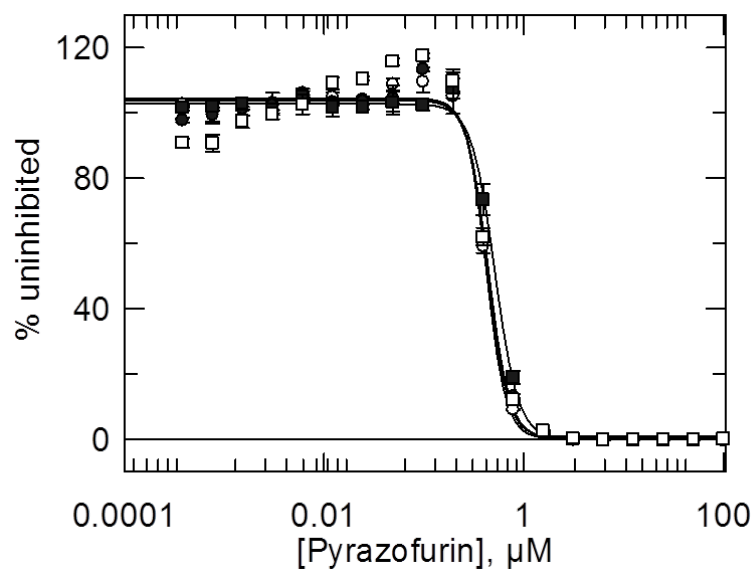

Supplement: mmi0090-0443-sd1.pdf [file mmi0090-0443-sd1.pdf]
